# Supplementary material
Source: Springer Nature journal article supplement (https://www.springermedizin.de/resource/supplementary/12889_2006_482_MOESM2_ESM.pdf/9500972)
Supplement: MOESM2 [file 9500972]

Prevalence screen (year 0)  
N= 13,004

D: 1474  
R: 2520  
M: 183  
AR: 23%

Incidence wave (year 2)  
N=8,827

D: 3992  
R: 1373  
M: 342  
AR: 35%

Incidence wave (year 10)  
N=3,145  
(25 individuals re-entered after year 2)
